# Supplementary material for: Structural features and oxidative stress towards plasmidDNA of apramycin copper complex
Source: Royal Society of Chemistry journal article supplement (doi:10.1039/b815046j), 2008-12-18
Supplement: b815046j.pdf [file b815046j.pdf]

**Table 1S:**  $^{13}\text{C}$  (obtained by 2D HSQC) and  $^1\text{H}$  chemical shifts (obtained by 1D and 2D ROESY, COSY and TOCSY) of apramycin in  $\text{D}_2\text{O}$  at pH 6.5 and  $T=300\text{ K}$ .

| $^{13}\text{C}$ | $\delta$ (ppm) | $^1\text{H}$ | $\delta$ (ppm) |
|-----------------|----------------|--------------|----------------|
| C1              | 49.62          | H1           | 3.23           |
| C2              | 29.43          | H2ax         | 1.68           |
|                 |                | H2eq         | 2.36           |
| C3              | 48.25          | H3           | 3.28           |
| C4              | 80.41          | H4           | 3.72           |
| C5              | 74.70          | H5           | 3.60           |
| C6              | 72.79          | H6           | 3.52           |
| C1'             | 95.28          | H1'          | 5.60           |
| C2'             | 47.98          | H2'          | 3.58           |
| C3'             | 26.86          | H3'ax        | 2.02           |
|                 |                | H3'eq        | 2.32           |
| C4'             | 65.78          | H4'          | 3.94           |
| C5'             | 69.29          | H5'          | 3.76           |
| C6'             | 62.36          | H6'          | 4.53           |
| C7'             | 59.21          | H7'          | 3.32           |
| C8'             | 92.64          | H8'          | 5.18           |
| Cmet            | 29.78          | Hmet         | 2.75           |
| C1''            | 94.10          | H1''         | 5.48           |
| C2''            | 70.22          | H2''         | 3.63           |
| C3''            | 69.61          | H3''         | 3.89           |
| C4''            | 51.81          | H4''         | 3.08           |
| C5''            | 69.61          | H5''         | 3.89           |
| C6''            | 60.14          | H6''a        | 3.81           |
|                 |                | H6''b        | 3.74           |

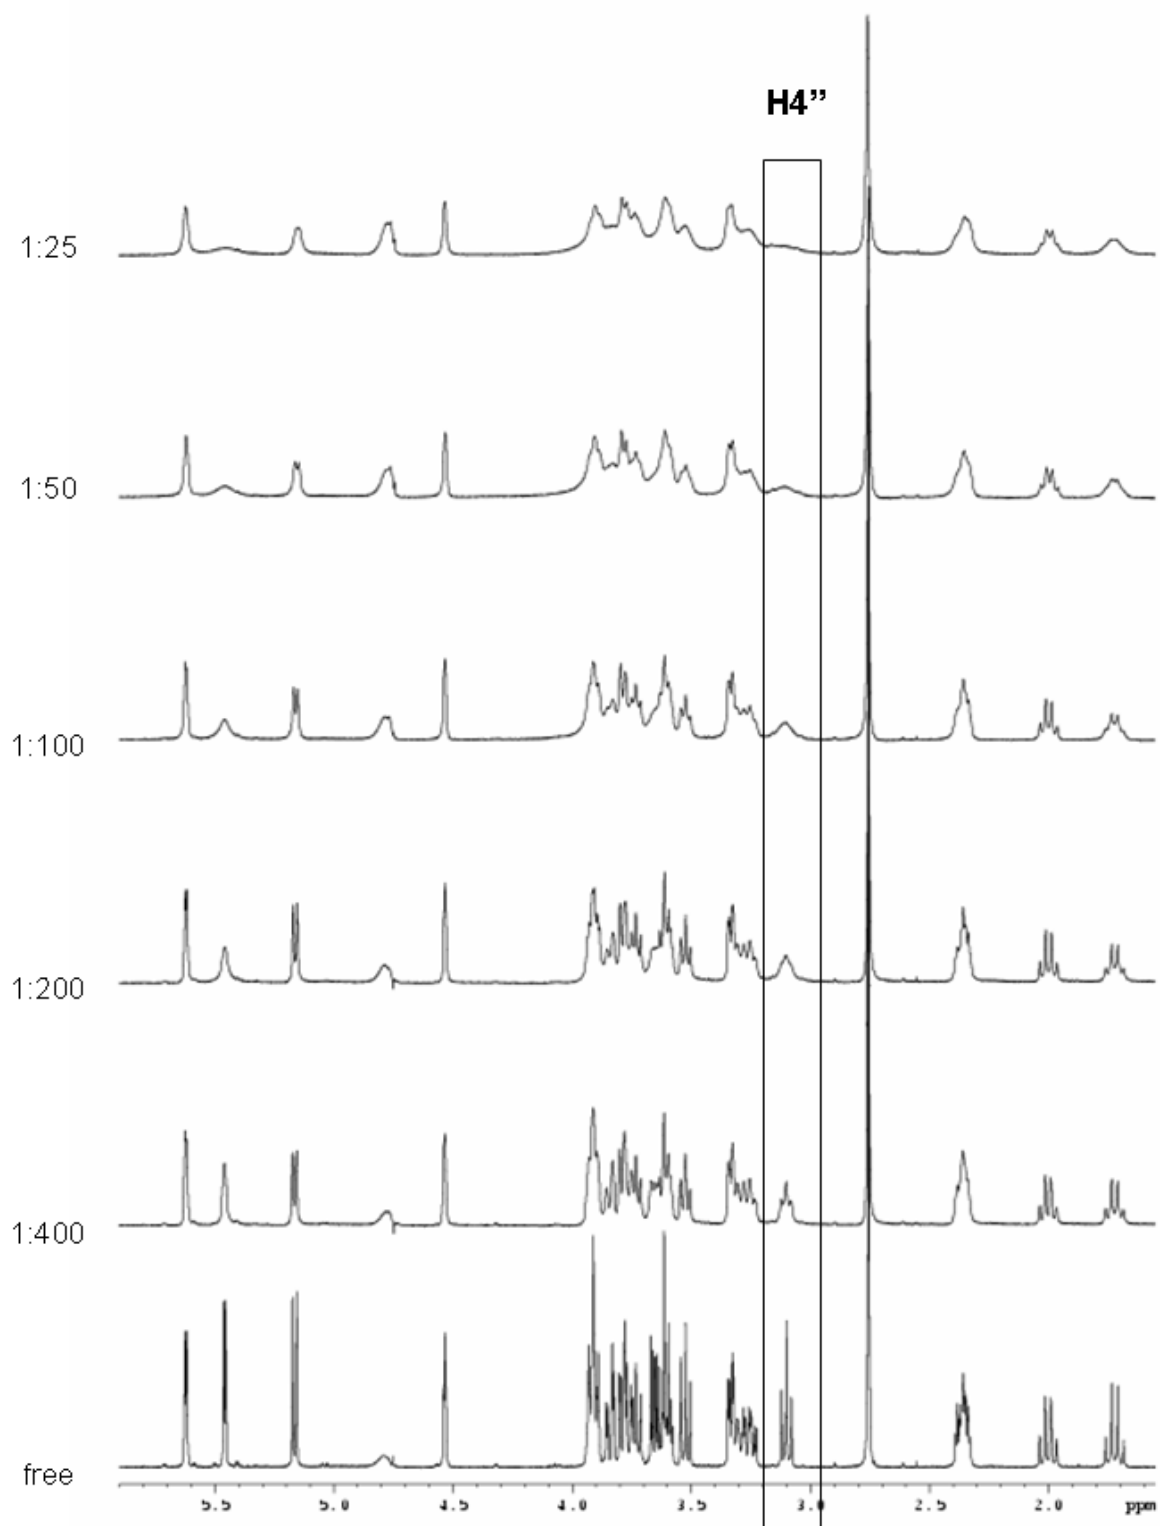

**Figure 1S:** 1D spectra of apramycin, free and in the presence of increasing amounts of copper.
